# Supplementary material for: FLT3-ITDs Instruct a Myeloid Differentiation and Transformation Bias in Lymphomyeloid Multipotent Progenitors
Source: PubMed Central journal article supplement — Cell Rep. 2013 Jun 27;3(6):1766–76. doi: 10.1016/j.celrep.2013.04.031 (PMC3701326; doi:10.1016/j.celrep.2013.04.031), 2013-06-27
Supplement: mmc1.pdf [file mmc1.pdf]

**Table S1.** Antigens Used for Identification of Specific Cell Populations

| Population                 | Phenotype                                                                                                                                          | Assays used                     |
|----------------------------|----------------------------------------------------------------------------------------------------------------------------------------------------|---------------------------------|
| Myeloid cells              | Mac1 <sup>+</sup>                                                                                                                                  | Lineage analysis                |
| B-cell                     | B220 <sup>+</sup> CD19 <sup>+</sup>                                                                                                                | Lineage analysis                |
| T-cell                     | CD4 <sup>+</sup> and/or CD8 <sup>+</sup>                                                                                                           | Lineage analysis                |
| LSK                        | Lineage (CD4, CD5, CD8a, Mac1, B220, Ter119, Gr1) <sup>-</sup> Sca1 <sup>+</sup> cKit <sup>+</sup>                                                 | HSC/MPP staging                 |
| HSC (BM)                   | Lineage (CD4, CD5, CD8a, Mac1, B220, Ter119, Gr1) <sup>-</sup> Sca1 <sup>+</sup> cKit <sup>+</sup> CD150 <sup>+</sup> CD48 <sup>-</sup>            | HSC/MPP staging                 |
| HSC (FL)                   | Lineage (CD5, CD8a, B220, Ter119, Gr1) <sup>-</sup> Sca1 <sup>+</sup> cKit <sup>+</sup> CD150 <sup>+</sup> CD48 <sup>-</sup>                       | HSC/MPP staging                 |
| MPP (BM)                   | Lineage (CD4, CD5, CD8a, Mac1, B220, Ter119, Gr1) <sup>-</sup> Sca1 <sup>+</sup> cKit <sup>+</sup> CD150 <sup>-</sup> CD48 <sup>+</sup>            | HSC/MPP staging, CCR9 analysis  |
| DN1                        | Lineage (CD3e, NK1.1, B220, Gr1, CD11c, CD19) <sup>-</sup> CD4 <sup>-</sup> CD8 <sup>-</sup> CD44 <sup>+</sup> CD25 <sup>-</sup>                   | Early thymic progenitor staging |
| ETP (DN1Kit <sup>+</sup> ) | Lineage (CD3e, NK1.1, B220, Gr1, CD11c, CD19) <sup>-</sup> CD4 <sup>-</sup> CD8 <sup>-</sup> CD44 <sup>+</sup> CD25 <sup>-</sup> cKit <sup>+</sup> | Early thymic progenitor staging |
| DN2Kit <sup>+</sup>        | Lineage (CD3e, NK1.1, B220, Gr1, CD11c, CD19) <sup>-</sup> CD4 <sup>-</sup> CD8 <sup>-</sup> CD44 <sup>+</sup> CD25 <sup>+</sup> Kit <sup>+</sup>  | Early thymic progenitor staging |
| DN3                        | Lineage (CD3e, NK1.1, B220, Gr1, CD11c, CD19) <sup>-</sup> CD4 <sup>-</sup> CD8 <sup>-</sup> CD44 <sup>-</sup> CD25 <sup>+</sup>                   | Early thymic progenitor staging |
| Pre-pro-B                  | Lineage (CD3e, CD11b, Gr1, Ter119, Ly6c) <sup>-</sup> CD19 <sup>-</sup> CD24 <sup>-</sup> CD43 <sup>mid</sup> AA4.1 <sup>+</sup> B220 <sup>+</sup> | B-cell progenitor staging       |
| Pro-B                      | Lineage (CD3e, CD11b, Gr1, Ter119, Ly6c) <sup>-</sup> B220 <sup>+</sup> CD43 <sup>+</sup> CD19 <sup>+</sup> CD24 <sup>mid</sup> AA4.1 <sup>+</sup> | B-cell progenitor staging       |

HSC hematopoietic stem cell; MPP multipotent progenitor; DN double negative.

**Table S2.** Antibodies and Viability Stains Used for FACS Staining

| <b>Antigen</b> | <b>Conjugate</b> | <b>Company</b> | <b>Catalogue Number</b> | <b>Staining panel</b>        |
|----------------|------------------|----------------|-------------------------|------------------------------|
| AA4.1          | PE Cy7           | eBio           | 25-5892-81              | B Cell staging               |
| B220           | PE Cy5           | BD             | 553091                  | CCR9, HSC                    |
| B220           | PE TxR           | BD             | 551489                  | Lin, B Cell staging          |
| B220           | APC              | BioL           | 103211                  | Thymocyte progenitor staging |
| CCR9           | APC              | eBio           | 17-1991-82              | CCR9                         |
| Cd11c          | APC              | eBio           | 17-0114-81              | Thymocyte progenitor staging |
| CD150          | PE Cy7           | BioL           | 115914                  | CCR9, HSC                    |
| CD19           | PE Cy7           | eBio           | 25-0193-82              | Lin                          |
| CD19           | APC              | BD             | 550992                  | Thymocyte progenitor staging |
| CD19           | FITC             | BD             | 553785                  | B Cell staging               |
| CD24           | PE               | eBio           | 12-0242-81              | B Cell staging               |
| CD25           | Per CP Cy5.5     | BD             | 551071                  | Thymocyte progenitor staging |
| CD3e           | APC              | eBio           | 17-0031-81              | Thymocyte progenitor staging |
| CD3e           | Biotin           | eBio           | 13-0033-82              | B Cell staging               |
| CD4            | PE Cy5           | BD             | 553050                  | CCR9, HSC                    |
| CD4            | APC eF780        | eBio           | 47-0042-82              | Lin                          |
| CD4            | AF700            | eBio           | 56-0042-82              | Thymocyte progenitor staging |
| CD43           | APC              | BD             | 560663                  | B Cell staging               |
| CD44           | FITC             | BD             | 553133                  | Thymocyte progenitor staging |
| CD48           | PE               | BioL           | 103405                  | CCR9                         |
| CD48           | APC              | BioL           | 130412                  | HSC                          |
| CD5            | PE Cy5           | BioL           | 100610                  | CCR9, HSC                    |
| CD8            | APC eF780        | eBio           | 47-0081-82              | Lin                          |
| CD8a           | PE Cy5           | BD             | 553034                  | CCR9, HSC                    |
| CD8a           | PE Cy7           | eBio           | 25-0081-82              | Thymocyte progenitor staging |
| cKit           | APC Cy5.5        | Invitrogen     | RM6219                  | B Cell staging               |
| c-Kit          | APC eF780        | eBio           | 47-1171-82              | CCR9, HSC, ETP               |

| <b>Antigen</b> | <b>Conjugate</b>                                                | <b>Company</b> | <b>Catalogue Number</b> | <b>Staining panel</b>        |
|----------------|-----------------------------------------------------------------|----------------|-------------------------|------------------------------|
| Flt3           | PE                                                              | BD             | 553842                  | HSC                          |
| Flt3           | PE                                                              | BioL           | 135305                  | Thymocyte progenitor staging |
| Gr1            | PE Cy5                                                          | BioL           | 108410                  | CCR9, HSC                    |
| Gr1            | FITC                                                            | eBio           | 11-5931-85              | Lin                          |
| Gr1            | Biotin                                                          | eBio           | 13-5931-82              | B Cell staging               |
| Gr1            | APC                                                             | BioL           | 108412                  | Thymocyte progenitor staging |
| Kit            | APC                                                             | BD             | 553356                  | Lin                          |
| Ly6C           | Biotin                                                          | BD             | 557359                  | B Cell staging               |
| Mac1           | PE Cy5                                                          | BioL           | 101210                  | CCR9, HSC                    |
| Mac1           | PE                                                              | eBio           | 12-0112-85              | Lin,                         |
| Mac1           | Biotin                                                          | eBio           | 13-0112-82              | B Cell staging               |
| NK1.1          | PB                                                              | BioL           | 108722                  | Lin                          |
| NK1.1          | APC                                                             | eBio           | 17-5941-82              | Thymocyte progenitor staging |
| Sca-1          | PB                                                              | BioL           | 122520                  | CCR9, HSC                    |
| Streptavidin   | QD655                                                           | MP             | Q10121MP                | B Cell staging               |
| Ter119         | PE Cy5                                                          | BioL           | 116210                  | CCR9, HSC                    |
| Ter119         | Biotin                                                          | Invitrogen     | MTER15                  | B Cell staging               |
| Viability      | DAPI dilactate (4',6-diamidino-2-phenylindole, dihydrochloride) | Invitrogen     | D3571                   | Thymocyte and B-cell staging |
| Viability      | 7-aminoactinomycin D (7-AAD)                                    | Sigma          | A9400                   | HSC, Lin, CCR9               |

HSC hematopoietic stem cell; MPP multipotent progenitor

**Table S3.** Taqman Assays (Applied Biosystems) Used for Multiplex Quantitative Real-Time PCR

| <b>Assay</b>  | <b>Assay ID</b> |
|---------------|-----------------|
| <i>Cd79a</i>  | Mm00432423_m1   |
| <i>Cebpa</i>  | Mm00514283_s1   |
| <i>Cebpb</i>  | Mm00843434_s1   |
| <i>Cited2</i> | Mm00516121_m1   |
| <i>Csf1r</i>  | Mm00432689_m1   |
| <i>Csf2r</i>  | Mm00438331_g1   |
| <i>Csf3r</i>  | Mm00432735_m1   |
| <i>Ebfl</i>   | Mm00395519_m1   |
| <i>Eklf</i>   | Mm00516096_m1   |
| <i>Epor</i>   | Mm00438760_m1   |
| <i>Gapdh</i>  | Mm99999915_g1   |
| <i>Gata1</i>  | Mm00484678_m1   |
| <i>Gata3</i>  | Mm00484683_m1   |
| <i>Hes1</i>   | Mm01342805_m1   |
| <i>Hes5</i>   | Mm00439311_g1   |
| <i>HoxB4</i>  | Mm00657964_m1   |
| <i>Hprt1</i>  | Mm00446968_m1   |
| <i>Id1</i>    | Mm00775963_g1   |
| <i>Il2ra</i>  | Mm00434261_m1   |
| <i>Il7r</i>   | Mm00434295_m1   |
| <i>Il7r</i>   | Mm00434295_m1   |
| <i>Mafb</i>   | Mm00627481_s1   |
| <i>Mcl1</i>   | Mm00725832_s1   |
| <i>Meis1</i>  | Mm00487664_m1   |
| <i>Mpl</i>    | Mm00440310_m1   |
| <i>Myb</i>    | Mm00501741_m1   |
| <i>Notch1</i> | Mm00435249_m1   |
| <i>Pax5</i>   | Mm00435501_m1   |
| <i>Pim1</i>   | Mm00435712_m1   |

| <b>Assay</b> | <b>Assay ID</b> |
|--------------|-----------------|
| <i>Rag1</i>  | Custom          |
| <i>Rag2</i>  | Mm00501300_m1   |
| <i>Sfp1</i>  | Mm00488140_m1   |
| <i>sIgH</i>  | Custom          |
| <i>Socs1</i> | Mm00782550_s1   |
| <i>Vwf</i>   | Mm00550376_m1   |
